# Supplementary material
Source: publisher site journal article supplement (http://www.dovepress.com/get_supplementary_file.php?f=226935.docx)
Supplement: Supplementary file 1 [file get_supplementary_file.php]

**
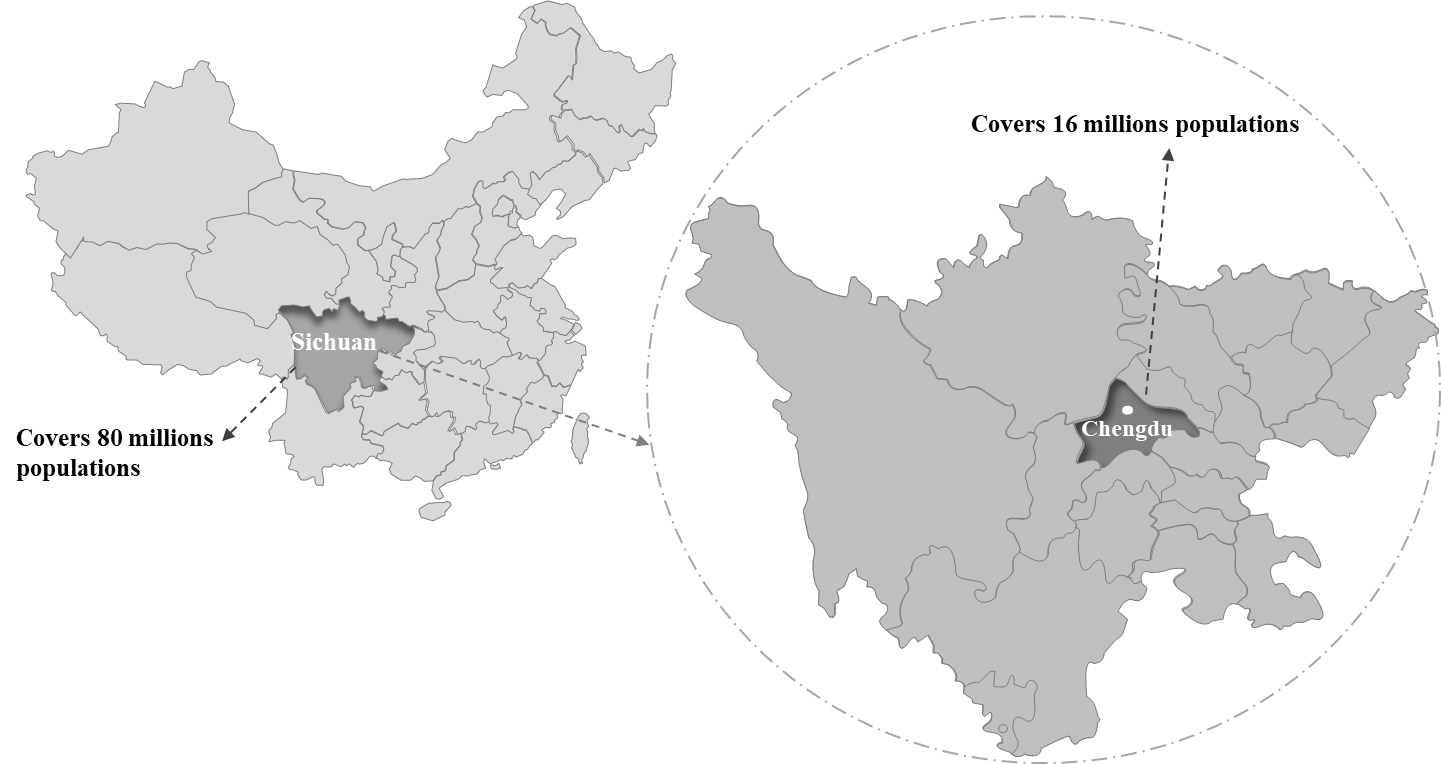
**

**Figure S1 Study location for the ICU-HAI registry**

| Diagnosis | ICD-10 code |
| --- | --- |
| Valvulopathy | I05, I06, I07, I08, I34, I35, I36, I37 |
| [Pneumonia](javascript:;) | A02.2, A40.3, B20.6, B25.0, B44.1, B49.X, B59.0, B59.X, I88.9，J10.0, J11.0, J12.0, J12.9-J13.0, J15.0-J15.2, J15.4-J16.0, J18.0, J18.8-J18.9, J24.9, J44.0, J44.8, J69.0, J84.1, J84.9, J85.1-J85.2, J98.4, O99.5, P23.9 |
| Heart septal defectsatrial | Q21 |
| Cerebral hemorrhage | I60, I61, I62, I69, O99.4 |
| Aortic dissection | I71 |

**Table S1. The primary ICD-10 code of discharge diagnosis**
